# Supplementary material
Source: PubMed Central journal article supplement (PMC5481984)
Supplement: DC162736SupplementaryData.pdf [file DC162736SupplementaryData.pdf]

## SUPPLEMENTARY DATA

**Supplementary Table 1.** Hazard ratio for the primary cardiovascular endpoints for pioglitazone (PROactive plus IRIS), GLP-1 RAs (liraglutide plus semaglutide) and empagliflozin.

### [A] Pioglitazone:

| <u>PROactive + IRIS</u> | <u>Hazard Ratio</u> | <u>95% CI</u> |
|-------------------------|---------------------|---------------|
| Stroke                  | 0.82                | 0.692-0.99    |
| MI                      | 0.74                | 0.60-0.91     |
| Mortality               | 0.92                | 0.79-1.09     |
| 3-POINT MACE            | 0.82                | 0.73-0.92     |

### [B] Long Acting (≥24 hours): GLP-1 RAs:

| <u>SUSTAIN+LEADER</u> | <u>Hazard Ratio</u> | <u>95% CI</u> |
|-----------------------|---------------------|---------------|
| Stroke                | 0.82                | 0.69-0.99     |
| MI                    | 0.84                | 0.73-0.97     |
| Mortality             | 0.87                | 0.77-0.99     |
| 3-POINT MACE          | 0.85                | 0.78-0.94     |

### [C] Empagliflozin

| <u>EMPA REG OUTCOME</u> | <u>Hazard Ratio</u> | <u>95% CI</u> |
|-------------------------|---------------------|---------------|
| Stroke                  | 1.24                | 0.92-1.67     |
| MI                      | 0.92                | 0.75-1.13     |
| Mortality               | 0.68                | 0.57-0.82     |
| 3-POINT MACE            | 0.86                | 0.74-0.99     |
